## Reward-related regions form a preferentially coupled system at rest

Jeremy F. Huckins<sup>1\*</sup>, Babatunde Adeyemo<sup>2</sup>, Fran M. Miezin<sup>2</sup>, Jonathan D. Power<sup>3</sup>,  
Evan M. Gordon<sup>4</sup>, Timothy O. Laumann<sup>2</sup>, Todd F. Heatherton<sup>1</sup>,  
Steven E. Petersen<sup>2</sup>, & William M. Kelley<sup>1</sup>

<sup>1</sup>Department of Psychological and Brain Sciences, Dartmouth College, Hanover, NH

<sup>2</sup>Department of Neurology, Washington University School of Medicine, Saint Louis, MO

<sup>3</sup>Department of Psychiatry, Weill Cornell College of Medicine, New York, NY

<sup>4</sup>VISN 17 Center of Excellence for Research on Returning War Veterans, Waco, TX

\*To whom correspondence should be addressed: [jeremy.huckins@dartmouth.edu](mailto:jeremy.huckins@dartmouth.edu)

### Keywords

Reward, Self-regulation, Resting-state fMRI, Network, System, Nucleus Accumbens,

Orbitofrontal Cortex

## Abstract

Neuroimaging studies have implicated a set of striatal and orbitofrontal cortex (OFC) regions that are commonly activated during reward processing tasks. Resting-state functional connectivity (RSFC) studies have demonstrated that the human brain is organized into several functional systems that show strong temporal coherence even in the absence of goal-directed tasks. Here we use seed-based and graph-theory RSFC approaches to characterize the systems-level organization of putative reward regions of at rest. Seed-based RSFC patterns for the nucleus accumbens (NAcc) and OFC were used to identify candidate reward regions; graph-theory was then used to determine system-level membership for these regions. Several regions previously implicated in reward-processing (NAcc, lateral and medial OFC, and ventromedial prefrontal cortex) comprised a distinct, preferentially coupled system. This RSFC system is stable across a range of connectivity thresholds and shares strong overlap with meta-analyses of task-based reward studies. This reward system shares between-system connectivity with systems implicated in cognitive control and self-regulation, including the fronto-parietal, cingulo-opercular, and default systems. Further, differences may exist in the pathways through which control systems interact with key regions of this reward system. Whereas NAcc regions of the reward system are functionally connected to cingulo-opercular and default systems, OFC regions of the reward system show stronger connectivity with the fronto-parietal system. We propose that future work may be able to interrogate group or individual differences in connectivity profiles using the regions delineated in the current work to explore potential relationships to appetitive behaviors, self-regulation failure, and addiction.

## Introduction

Reward is a multifaceted term which captures multiple components of cognitive experience and behavior related to liking, wanting and learning (Berridge & Kringelbach, 2008). Non-human animal studies show that consuming rewards (foods, drugs) or engaging in rewarding activities (i.e., sex) is associated with activation of mesolimbic dopamine brain regions (e.g., the ventral tegmental area and nucleus accumbens/ventral striatum) and the orbitofrontal cortex (Boileau et al., 2003; Carelli, Ijames, & Crumling, 2000; Damsma, Pfaus, Wenkstern, Phillips, & Fibiger, 1992; Everitt, 1990; M. L. Kringelbach, 2005; Schilström, Svensson, Svensson, & Nomikos, 1998). In humans, functional neuroimaging work has similarly shown that activity in the ventral striatum and orbitofrontal cortex (OFC) increases during both reward consumption (Breiter et al., 1997; Gottfried, O'Doherty, & Dolan, 2003; Kringelbach, O'Doherty, Rolls, & Andrews, 2003) and reward anticipation, such as when viewing a food advertisement or when seeing or smelling a cigarette (Carter & Tiffany, 1999; Harris, Bargh, & Brownell, 2009; Lambert, Neal, Noyes, Parker, & Worrel, 1991; Rapuano, Huckins, Sargent, Heatherton, & Kelley, 2016; Sayette & Hufford, 1997). In addition to activation of the ventral striatum, and OFC, human neuroimaging work has consistently shown reward-related activity extending into the thalamus, the dorsal striatum, VTA, medial prefrontal cortex, and insula in response to reward cues such as food images, drugs, attractive faces, as well as to secondary reward cues such as money (Cloutier, Heatherton, Whalen, & Kelley, 2008; Due, Huettel, Hall, & Rubin, 2002; Garavan et al., 2000; Knutson, Taylor, Kaufman, Peterson, & Glover, 2005; Sescousse, Caldú, Segura, & Dreher, 2013; Somerville, Hare, & Casey, 2011; van der Laan, de Ridder, Viergever, & Smeets, 2011; Yarkoni, Poldrack, Nichols, Van Essen, & Wager, 2011).

More recently, the field of neuroscience has demonstrated a relationship between reward cue-reactivity and real-world appetitive cravings and behaviors such as weight gain, and sexual interest (Demos, Heatherton, & Kelley, 2012; Janes et al., 2010; Lopez, Hofmann, Wagner, Kelley, & Heatherton, 2014; McClernon, Kozink, & Rose, 2008; Stice, Yokum, Bohon, Marti, & Smolen, 2010). Importantly, experimentally-measured reward responsivity can reflect well-established sensitivities to rewards. Casey and colleagues (2011) showed that individuals who had difficulty delaying gratification as a child (e.g., Mischel et al., 1989) exhibited heightened reward responsivity in the ventral striatum when viewing appetitive cues over 40 years later. Given the common pattern of activation across task-based studies of reward and their relation to individual differences in reward motivation and behavior, researchers have posited a putative human “reward system” that functions to represent reward signal strength and to motivate subsequent behavior towards reward cues (Koob & Volkow, 2010; Volkow, Wang, Fowler, Tomasi, & Telang, 2011).

Converging evidence in support of this idea comes from studies examining resting-state functional connectivity (RSFC) patterns between the ventral striatum and other brain regions (Barnes et al., 2010; Cauda et al., 2011; Choi, Yeo, & Buckner, 2012; Di Martino et al., 2008). RSFC measures the degree to which spontaneous activity across brain regions correlates at rest (i.e., in the absence of explicit task-constraints) (Biswal et al., 1995). RSFC signal correlations are believed to reflect histories of co-activation across brain regions—a pattern of statistical coherence that arises throughout development and provides a measure of the long-term functional relatedness of brain regions (Crossley et al., 2013; Dosenbach et al., 2010). Thus far, the majority of neuroimaging studies examining RSFC in putative reward regions have primarily adopted *seed-based* approaches whereby a seed is placed in one brain region and the analysis

identifies other brain regions with similar spontaneous fluctuations in activity. Such seed-based studies of ventral striatum RSFC have commonly identified correlated activity in orbitofrontal and ventral regions of prefrontal cortex, posterior cingulate cortex, inferior parietal lobule, thalamus, hippocampus and caudate (Barnes et al., 2010; Cauda et al., 2011; Choi et al., 2012; Di Martino et al., 2008). Additionally, Choi and colleagues (2012) determined that the ventral striatum was primarily connected to a “limbic” system which included ventral prefrontal cortex in their 17 system parcellation. There seems to be considerable correspondence between the extant seed-based RSFC maps and the task-based maps, lending credence to the notion that putative reward regions are preferentially activated and coupled, across both task and resting-state studies.

The notion of a reward system makes intuitive sense given the converging evidence from meta-analyses of task-based reward studies and seed-based RSFC studies; however, an open question is whether the reward-related activations that are commonly observed across task-based studies of reward and in seed-based maps of RSFC constitute a discrete functional system, in which reward-related regions are preferentially connected to each other at rest, or whether reward cue-reactivity tasks engage brain regions across multiple functional systems. We know that a wide-range of regions process reward-related information, is there a distinct subset of regions which are preferentially connected to each other at rest which include regions typically thought to part of the human reward system. Put simply, is there a set of brain regions that constitute a preferentially coupled functional reward system in the human brain at rest?

One fruitful way to identify and characterize discrete brain systems is to apply network analyses to RSFC data. In particular, graph-theory-based network analysis is a powerful

approach to examining RSFC that reveals the integrity of brain systems as well as how connectivity between systems function within wider network contexts (Power et al., 2011).

This network-based approach to understanding brain organization and function (Power et al., 2011) has already identified resting-state systems corresponding to sensory processing, motor control, attention, and, importantly, additional resting-state systems that likely support aspects of self-regulation—the fronto-parietal system, the cingulo-opercular system, and the default mode system (Corbetta, 1998; Dosenbach et al., 2006; Shulman et al., 1997) that may function to regulate putative reward-related activity (Kelley et al., 2015; Lopez et al., 2017; Somerville et al., 2011; Weiland et al., 2013; Zanto & Gazzaley, 2013). Several regions within the default mode network including regions of the medial prefrontal cortex and poster cingulate cortex have been linked to the representation of self (Kelley et al., 2002; Moran, Macrae, Heatherton, Wyland, & Kelley, 2006) and these regions may play an important role in establishing long-term goals consistent with one’s sense of self. The cingulo-opercular system has been described as a core system for the maintenance and monitoring of long term goals and task sets (Dosenbach et al., 2007; Sadaghiani & D’Esposito, 2015). Activity within three key regions of this system—the left and right anterior insula/frontal operculum and the dorsal anterior cingulate extending into the middle superior frontal cortex all show a robust, domain general spike in activity at the beginning of goal-directed task performance that is maintained in a tonic manner throughout the task and is sensitive to performance related feedback. The fronto-parietal system incorporates dorsolateral PFC regions, posterior parietal and inferotemporal regions that are commonly activated during tasks that place demands on inhibitory control, working memory, and attentional filtering (Dosenbach et al., 2007). Together, these systems contain many of the cortical regions which are typically identified in event-related fMRI studies of self-regulation.

Reproducibility of functional architecture and systems across individuals and laboratories suggests that RSFC has a common architecture (Biswal et al., 2010). Noticeably absent from network-based RSFC analyses thus far, however is evidence of a distinct reward system that resembles the sets of brain regions that are commonly active during task-based studies of reward. This is despite robust overlap in activation patterns between task-based studies of reward and *seed-based* RSFC studies of key reward regions such as the ventral striatum. One possibility is that the brain regions showing strong seed-based functional connectivity with the ventral striatum are pieces of separate systems that are jointly recruited during tasks that promote reward processing. If so, then the notion of a true “reward system” may be misleading. A second possibility is that prior network-based studies of RSFC failed to identify a reward system in part because of the way nodes are chosen for inclusion in graph-theory analyses. For example, Power and colleagues (2011) used meta-analyses of task-based studies to define a set of spherical nodes distributed throughout the brain for further analysis. This approach provided robust, but not full, brain coverage, omitting nodes for the ventral striatum and other subcortical areas which are difficult to define using large spherical nodes. In short, community assignments in network-based RSFC analyses can be highly dependent on how brain nodes are chosen, defined, and thresholded whereas seed-based RSFC approaches do not readily permit ways to assess community assignments. Collectively, however, seed-based RSFC and graph-theory network analyses may be complementary— seed-based approaches may be useful in (1) identifying potential target regions which can then (2) be formally tested for community membership using graph theoretical analyses.

The current work capitalizes on both RSFC approaches in a large cohort of healthy individuals. We used seed-based RSFC patterns from putative reward regions (i.e., the ventral

striatum and lateral OFC) to identify *candidate* reward system regions. We extended previous work by Power and colleagues (2011) using graph theoretical techniques to determine if these regions comprised a distinct reward system in the human brain. Three possible outcomes were considered: 1) no resting-state reward system (i.e., all of the candidate nodes are members of other RSFC systems); 2) all of the candidate reward regions clustered into a distinct system, and 3) a subset of the regions comprised a distinct system. Characterizing where the communities that candidate reward regions were members of and how they interact may prove critical in understanding individual differences that permit some individuals to successfully resist unhealthy temptations in daily life and lead others to self-regulation failures.

## **Material and Methods**

### *Subjects*

Subjects were 1,016 individuals from the Dartmouth College community. The results presented here are from 828 subjects (580 females) with a mean age of 20.8 +/- 3.7 years old (range: 18-49), who passed stringent RSFC screening measures developed by Power et al. (2014), described below. Subjects had normal or corrected-to-normal visual acuity. Each subject provided informed consent in accordance with the guidelines set by the Committee for the Protection of Human Subjects at Dartmouth College and received either course credit or monetary compensation for participating in the study.

### *Apparatus*

Imaging was performed on a Philips Intera Achieva 3-Tesla scanner (Philips Medical Systems, Bothell, WA) using a 32-channel phased array head coil. During scanning, participants



viewed a white fixation cross on a black background projected on a screen positioned at the head end of the scanner bore, which participants viewed through a mirror mounted on top of the head coil.

### *Imaging*

Anatomic images were acquired using a high-resolution 3-D magnetization-prepared rapid gradient echo sequence (MP-RAGE; 160 sagittal slices; TE, 4.6 ms; TR, 9.9 ms; flip angle, 8°; voxel size, 1 x 1 x 1 mm). Resting-state functional images were collected using T2\*-weighted fast field echo, echo planar functional imaging sensitive to BOLD contrast (TR= 2500 ms; TE= 35 ms; flip angle= 90°; 3 x 3 mm in-plane resolution; sense factor of 2). Functional scanning was performed in two runs; during each run, 120 or 240 axial images (36 slices, 3.5 mm slice thickness, 0.5 mm skip between slices) were acquired, allowing complete brain coverage. As such, each participant completed between 10 and 20 minutes of RSFC scanning.

### *RSFC Analyses*

All processing was performed exactly as in Power et al. (2014) with two exceptions: frame-displacement (FD) threshold was set to 0.25mm (instead of 0.2mm) and 36 motion parameters (instead of 24) were used for motion regression. Functional images were preprocessed to reduce artifacts, including: (i) slice-timing correction, (ii) rigid body realignment to correct for head movement within and across runs, (iii) within-run intensity normalization such that the intensity of all voxels and volumes achieved a mode value of 1000 scale with 10 units equal to ~1% signal change, (iv) transformation to a standardized atlas space (3 mm isotropic voxels) based on (Talairach & Tournoux, 1988), (v) frame censoring, (vi) nuisance

regression (excluding censored frames), (vii) interpolation, and (viii) bandpass filtering ( $0.009 < f < 0.08\text{Hz}$ ) following Power et al. (2014). Final correlation calculations between time-courses were calculated based upon *uncensored* frames.

Using these metrics, 828 of 1,016 individuals passed RSFC processing with more than 120 uncensored frames. Temporal masks retained 79% +/- 14% (range: 26%-98%) of the data across the 828 included subjects. Subjects retained, on average, 238.5 +/- 93.9 frames (range: 121 – 470).

### *Reward regions of interest*

Regions-of-interest (ROIs) for the left and right NAcc were individually defined for each subject based on an automated segmentation of the high-resolution MPRAGE anatomical image using FreeSurfer's automated parcellation tool aseg (Fischl et al., 2004). Voxel-based RSFC maps were then generated for each subject using their individually-defined nucleus accumbens (NAcc) ROIs. Bilateral OFC regions were defined based on prior task-based studies of reward (Wagner, Boswell, Kelley, & Heatherton, 2012) conducted in a subset of the same subjects included in the RSFC analyses reported here. These peak OFC regions shared strong overlap with OFC peaks identified in the task-based meta-analysis of reward (Yarkoni et al., 2011).

### *Neurosynth analysis*

To determine the extent to which RSFC was similar to *task-based* activation patterns observed in studies of reward, RSFC seed maps were compared to an automated meta-analysis performed using Neurosynth (Yarkoni et al., 2011). Mean bilateral NAcc and OFC RSFC seed maps for all 828 subjects were submitted to the Neurosynth Image Decoder which calculates the

correlation between an activation map and a statistical image for each of the 3000+ feature terms in the Neurosynth database ([Table I](#)).

### *Graph analysis*

Graph theoretical community assignments of RSFC data have been performed on regions previously identified through task-based meta-analyses (Power et al., 2011), automated whole-brain anatomical parcellation (Davis et al., 2013) and RSFC-boundary mapping (Gordon et al., 2014). Community assignment algorithms can then be used to identify systems (i.e., sub-networks) within the graph. Community assignments derived from approaches like these are dependent on how nodes are defined for the overall network and the tie-density ranges considered. Although prior graph theoretical community assignments have been performed on a network of nodes identified through meta-analyses of task-based studies (e.g., Power et al., 2011), none of the currently available parcellation schemes were optimized to include nodes from task-based studies of reward. Indeed, the initial parcellation scheme employed by Power et al. (2011) did not include subcortical NAcc nodes.

In the present study, we modified the existing set of regions (N=264) from Power et al. (2011) to include peaks identified from the NAcc and OFC RSFC group (N=828) seed maps. NAcc seeds were derived from individual anatomical segmentation, while OFC seeds were based on group-map peaks of NAcc RSFC connectivity, which also showed strong similarity to regions identified in task-based reward literature (Wagner et al., 2012). Nodes modified from the original 264 for graph analysis include left, right and medial OFC [BA 10/11], left and right dorsal frontal cortex [BA 46], left lateral prefrontal cortex [BA 9], left inferior medial temporal gyrus [BA 37], left inferior parietal lobule [BA 40], ventral tegmental area (VTA), bilateral

thalamus, hippocampus, caudate and right putamen. Where possible, subcortical regions were defined anatomically on a subject-by-subject basis using FreeSurfer auto-segmentation (left and right NAcc, left and right caudate, right putamen, left and right thalamus, and left and right hippocampus). These modifications resulted in a final set of 271 regions, with modifications to Power and colleagues (2011) described in [Table II](#).

Average time-courses for each node were calculated and cross-correlated with the time-courses from every other node to create a 271 x 271 correlation matrix for each subject. Mean connectivity matrices were then created and transformed into thresholded graphs across a wide range of tie-densities (strongest 2% to 20% of connections retained; Power et al., 2011). Network structure was assessed using the Infomap algorithm, a random-walk community assignment method (Rosvall & Bergstrom, 2008) as implemented in Graphools 1.0 available from [www.nitrc.org/projects/graphools/](http://www.nitrc.org/projects/graphools/).

To explore within- and between-system connectivity of the communities a disparity filter algorithm was used to construct a multiscale backbone of the network (Serrano, Boguñá, & Vespignani, 2009). Complex networks such as the internet, food chain webs and the brain, all contain connections between nodes which are important that scale multiple orders of magnitude. The disparity filter algorithm identifies connections between nodes which significantly deviate from a null model of random local assignment of weights to edges thereby preserving much of the network structure while decreasing the total number of connections. Identifying weak connections which are important has previously been shown to underlie individual differences (Santaracchi, Galli, Polizzotto, Rossi, & Rossi, 2014). The multiscale network backbone can then be used to identify connections which may be important for information transfer between a possible reward system and specific self-regulatory and control systems of interest.

### *Visualization*

All results were transformed into MNI space (Montreal Neurological Institute) and mapped onto the Conte69 mid-thickness surfaces or volume for visualization (Van Essen, Glasser, Dierker, Harwell, & Coalson, 2012). Group results were viewed in Connectome Workbench Version 1.1.1 (Marcus, Fotenos, Csernansky, Morris, & Buckner, 2010). Multiscale backbone results were visualized on inflated lateral, medial, and ventral cortical surfaces using BrainNet Viewer (Xia et al., 2013).

## **Results**

### *Automated Segmentation of NAcc*

Individual subject regions-of-interest (ROIs) for the left and right NAcc were defined using an automated segmentation algorithm (see Methods). The resulting NAcc masks were highly reliable across subjects with peak probabilities of 100% at [-8, 10, -10] and [9, 10, -11] (MNI coordinates). Fifty percent of the subjects had overlap in 900 and 880 voxels (mm<sup>3</sup>) for left and right NAcc masks, respectively. Seventy-five percent of the subjects shared overlap in 500 and 428 voxels (mm<sup>3</sup>).

### *Seed-based resting-state functional connectivity*

Voxel-based RSFC maps were created for bilateral NAcc using the individually-defined masks from the automated segmentation and for OFC using spherical seeds based on previous work (Wagner et al., 2012). NAcc demonstrated strong RSFC with the contralateral NAcc and bilateral regions of the medial and lateral OFC, thalamus, hippocampus, and midbrain/ventral tegmental area ([Figure 1](#)).

To determine if seed-based RSFC for these regions was similar to task-based activation patterns observed in studies of reward, bilateral NAcc and OFC seed maps were submitted to Neurosynth Decoder, an online tool to determine the similarity between the RSFC seed map and thousands of reverse-inference maps generated through automated meta-analyses of task-based fMRI studies (Yarkoni et al., 2011). Results of the reverse inference decoding analysis revealed the greatest similarity across all non-anatomical terms in the database between NAcc and OFC RSFC seed maps and the feature term “reward” (NAcc  $r = 0.58$ ; OFC  $r = 0.27$ ; Figure 1). [Table I](#) includes non-anatomical and anatomical terms which were showed the strongest correlation with NAcc (left) and OFC (right) RSFC seed maps.

### *Community detection*

Consistent with Power et al. (2011), communities were identified that included default, visual, fronto-parietal, cingulo-opercular/salience, attention, and somatomotor systems that were stable across a range of tie-densities (2%-20%). Additional systems from Power et al., (2011) were identified at lower tie-density thresholds including cerebellar (18%), subcortical (15%) and memory (8%) systems. The somatomotor system was further subdivided into and mouth and body somatomotor systems (6%). [Figure 2](#) shows system assignments at a representative 5% tie-density.

In contrast to Power et al. (2011), however, the present work observed a distinct system that included the NAcc bilaterally and multiple regions of the medial and lateral OFC. This putative reward system was stable across a broad range of tie densities (4% to 17%). Two points are worth noting regarding this system. First, not all regions identified from NAcc and OFC RSFC seed maps converged into this reward system. At 5% tie-density, five of the regions

identified in seed-based RSFC maps were assigned to the fronto-parietal system (lateral and dorsolateral frontal cortex), five were assigned to a subcortical system (left and right thalamus, left and right caudate, right putamen), two were assigned to a memory system (left and right hippocampus), and the VTA shared no connections to other nodes (at slightly higher tie-densities, e.g., 6% tie density, VTA was assigned to the memory system) (Figure 3; bold nodes). Second, four original nodes from the Power et al. (2011) graph were assigned to the “reward” system in the present analysis. In Power et al. (2011), these regions were previously assigned to fronto-parietal, default and an unlabeled system (Figure 3; green nodes without bold emphasis). At the highest tie-densities tested (18-20%) four of the nine reward nodes were subsumed by the default system (left and right NAcc and 0,43,-7; 8,48,-15), whereas the remaining five reward nodes were subsumed by the fronto-parietal system (23,33,-13; -24,35,-15; 8,41,-24; 24,45,-15; 34,38,-12).

Within the reward system, stability was heterogeneous across regions; eight of the nine regions identified as being part of the reward system were stable between tie-densities of 4%-17% (five of the eight remained in this system down to 2%); at higher tie densities three of these regions were associated with the default network and five were associated with the fronto-parietal network. The ninth region, a medial OFC region (MNI: 0,43,-7), was associated with the reward network across a more limited range of tie-densities (4%-8%), making it a less stable member of the reward network. This region was associated with the default network at tie-densities of 9% and higher.

The overall spring-embedded network organization was similar to previously identified layouts as observed across large numbers of individuals, with control and attention systems such as the fronto-parietal, cingulo-opercular, ventral attention and dorsal attention systems being

centrally located in the graph (Power et al., 2011). Canonical processing systems such as visual and somatomotor systems were located on the periphery of the graph. Across all tie-densities, the reward system was placed on the periphery of the graph. At low tie-densities (5%) the reward system connected with the default system (N=13 edges), cingulo-opercular (N=1) and subcortical (N=1) systems. At higher tie-densities (10%) the reward system was more densely interconnected with the default (N=34), fronto-parietal (N=11), cingulo-opercular (N=5), memory (N=3), dorsal attention (N=2) and subcortical (N=1) systems. As tie-densities increased further (> 17%), all reward system nodes were subsumed by default and fronto-parietal systems (Figure 4).

Community detection is sensitive to the nodes which are included and the connectivity threshold (tie-density) at which it is performed. For a system to be considered stable it should be identified across a variety of tie-densities. To determine the consistency of community detection results across systems and tie-densities, a “system stability” metric was calculated which measures the relative amount of tie-densities that a community was identified for a given node. Superordinate systems, i.e. systems identified at 20% tie-density included default, fronto-parietal, visual, somatomotor, and cingulo-opercular/salience. Subordinate systems (i.e. systems which were identified only at tie-densities less than 20%) included reward, memory, subcortical, attention (dorsal and ventral), cerebellar, and lateral somatomotor systems. Critically, the newly identified reward system demonstrated system-wide consistency over a wide-range of tie-densities, and, as such, displayed high mean system stability relative to other subordinate systems (Table III).

An additional advantage of using graph-theory analyses on RSFC data is that it affords an opportunity to characterize points of interaction between systems. To identify points of



interaction between the reward system and other systems, the entire network was submitted to a network reduction algorithm to identify the multiscale backbone of the system (Serrano et al., 2009). Backbone connectivity through reward system nodes was restricted to other reward system nodes and default system nodes (thresholded at  $p < 0.01$ ; Figure 5). At this threshold, no other systems were identified as having strong connections to reward system nodes.

To identify potential interactions between the reward system and systems implicated in self-regulation (e.g., default, cingulo-opercular, and fronto-parietal systems) (Kelley et al., 2015), the top 5% of between-system connections from reward system regions to regions of these putative control systems were identified (Figure 5). Across all putative control systems, the majority of between-system connections were observed between OFC regions of the reward system and prefrontal regions of default, cingulo-opercular, and fronto-parietal systems. This was particularly true for between-system connectivity with the fronto-parietal control system. By contrast, the primary between-system connections for the NAcc were with the dorsal anterior cingulate cortex extending into the middle frontal gyrus (BA 32; cingulo-opercular system) and the medial prefrontal cortex (BA 10; default system).

## Discussion

The current study applied seed and graph-theory based approaches to RSFC data from a large sample of healthy individuals using a set of nodes modified from previous work (Power et al., 2011). Seed-based RSFC canonical reward regions demonstrated a high degree of similarity with task-based meta-analyses on the feature term reward. Graph theory analyses that included these putative reward regions identified a set of regions which were preferentially coupled and formed a distinct community across a wide variety of tie-densities. Perhaps unsurprising, this

distinct “reward” community or system shows strong overlap with regions identified through task-based analyses of reward. Although seed-based and graph-based reward maps were consistent in some respects, notable differences were observed across the two approaches. We consider each in turn.

*Seed-based RSFC show robust overlap with task-based reward activity*

Seed-based RSFC from individually-defined NAcc regions showed robust overlap with task-based studies of reward. Peak correlations were observed in the striatum, medial and lateral OFC, and the hippocampus. These findings are consistent with prior studies of NAcc RSFC using spherical regions-of-interest (Di Martino et al., 2008). However, the present work also identified RSFC peaks in regions not previously reported by Di Martino and colleagues including thalamus and midbrain/ventral tegmental area. The extent to which the present findings differ from prior work may reflect differences owing to a different cohort of subjects, increased sample size, the greater specificity afforded by using individual NAcc segmentations instead of spherical nodes and different preprocessing approaches.

Seed-based RSFC for the lateral OFC showed strong overlap with RSFC for NAcc. The OFC was strongly correlated with lateral regions of the left and right OFC, the medial OFC, and bilateral NAcc. Additional connectivity was observed in lateral and dorsolateral frontal regions as well as lateral parietal regions that were not present in the NAcc RSFC map. These regions were identified in subsequent graph analyses to belong to the fronto-parietal system, however—a finding that suggests that one potential point of communication between the reward system and other systems important for self-regulation and control may occur via interactions between dorsolateral prefrontal cortex and the lateral OFC (Figure 3). By contrast, the NAcc was more

strongly correlated with regions of the default system (i.e., medial prefrontal cortex, inferior parietal lobule, and superior temporal gyrus), the memory system (i.e., parahippocampal gyrus) and subcortical structures (i.e. VTA/midbrain and thalamus).

Although the relationship between task-driven functional correlations and RSFC has been highlighted across the extant neuroimaging literature (Crossley et al., 2013; Smith et al., 2009; Tomasi, Wang, Wang, & Volkow, 2013), the exact nature of this relationship remains somewhat speculative. One possibility is that RSFC represents long-term Hebbian learning, such that populations of neurons across brain regions that fire together frequently strengthen spontaneous resting state correlations over time. As such, RSFC may represent the statistical history of co-activation patterns accumulated across the lifespan. In the present study, NAcc RSFC, and to a lesser extent OFC RSFC shared strong overlap with meta-analyses of task-based reward activity. Future studies may be able to capitalize on the similarity between RSFC and task-based reward patterns of activation to explore the development and interaction of the reward system with control systems, which have been argued to mature along different developmental trajectories (BJ J Casey, Jones, & Hare, 2008; Somerville & Casey, 2010) and may be influenced by genetic factors that influence the size and responsivity of reward system structures (Rapuano et al., 2017).

#### *Graph-theory identification of a reward system*

The present study used a modified set of regions from Power et al. (2011) and determined that canonical reward regions form a preferentially coupled resting-state reward system; system membership included bilateral NAcc, the medial and lateral OFC, and ventromedial prefrontal cortex. This system was stable across a wide range of tie-densities (4-17%) with eight of the

nine regions consistently assigned to the system across this range. It should be noted that qualitatively similar systems incorporating some of the ventromedial PFC and ventral striatum have been observed using different methods (Choi et al., 2012; Gerraty, Davidow, Wimmer, Kahn, & Shohamy, 2014). These complementary approaches suggest stability not just across tie-densities thresholds but across datasets and methods.

With the exception of regions that reorganized into the reward system identified here, there was strong overlap in community assignments across studies. Similar to Power et al. (2011), cognitive control systems such as the frontal-parietal and cingulo-opercular systems were centrally placed within the graph whereas somatosensory-motor and visual systems were placed on the periphery of the graph. The reward system, as defined in the current analysis, was placed at the periphery of the graph and showed the most connectedness with default, cingulo-opercular, and fronto-parietal systems (at liberal tie-densities). The relative locations of subsystems within a graph provide insights into whether a system may play a more regulatory role (centrally located within the graph), by virtue of their stronger connectedness with multiple systems, or whether a system functions primarily as a processing system (located at the periphery of the graph) with strong within-system connectivity and relatively weaker between-system connectivity. In this context, the reward system is more similar to other, well-established processing systems, and, as such, is likely a target of self-regulatory control via interactions with systems more centrally placed within the graph. Indeed, recent work by Power et al., (2013) has identified cortical hubs in RSFC data that demonstrate strong between-system connectivity in a way that positions hubs to interact with multiple systems, and lesions to these hubs have been shown to result in profound behavioral impairments across a range of tasks (Warren et al., 2014).

The present results suggest that the majority of between-system connections to the reward system occur between putative control systems (default, cingulo-opercular, and fronto-parietal systems) and OFC regions of the reward system. Interestingly, the OFC seed region identified from task-based studies of reward shares its primary between-system connections with the fronto-parietal system, whereas the NAcc shares its primary between-system connections with a single region of the cingulo-opercular system (dorsal anterior cingulate cortex; BA 32) and a single region of the default system (MPFC; BA 10). Indeed, at liberal tie-densities ( $> 17\%$ ), the OFC seed region associates with the fronto-parietal system, and the NAcc associates with the default system. The MPFC region of the default system has been implicated in the representation of self and self-affect (Kelley et al., 2002; Moran, Macrae, Heatherton, Wyland, & Kelley, 2006), and recent work by Chavez and Heatherton (2016) has demonstrated that the structural integrity of white matter pathways linking NAcc to this region of MPFC is associated with individual differences in self-esteem. The differential connectivity patterns between OFC, NAcc and putative control systems may offer critical insights into the differing roles of these regions in motivating and evaluating appetitive behaviors that have so far been elusive given the common coactivation of these regions during task-based studies of reward. Although the current results do not demonstrate direct evidence of regulation paths between control and reward networks, the present work identifies potential points of interaction with the multiscale network backbone analysis. Future work is needed to clarify the extent to which these connections may play a role in enhancing or regulating appetitive cravings and behavior. Towards that end, a better understanding of the cortical architecture that permits regulation of these reward regions may ultimately permit more targeted intervention strategies for the treatment of maladaptive habits and addictions.

The most notable difference between Power et al. (2011) and the present study was the inclusion of NAcc nodes in the present study and the absence of NAcc nodes in the prior work. Previous RSFC work using a winner-take-all method using only subcortical regions associated much of the ventral striatum with a limbic system that included portions of the temporal poles (Choi et al., 2012). Davis and colleagues (2013) demonstrated that NAcc system membership may depend in part on individual differences in reward impulsivity. In a high impulsivity group, NAcc clustered with other subcortical regions such as caudate, amygdala, hippocampus, thalamus and brainstem whereas in a low impulsivity group, subcortical regions clustered with top-down cognitive control regions, such as medial and lateral portions of the prefrontal cortex.

Importantly, however, not all of the candidate reward system regions identified from seed-based RSFC analyses were formally assigned to the reward system identified using graph-based network analyses, highlighting the complementary nature of the two approaches (Figure 3). Two important distinctions can be made. First, there is near complete overlap between regions assigned to the reward system in the graph analysis and the meta-analysis of task-based studies of reward, even though some of these regions (e.g., anterior OFC nodes) were not identified as peaks in the seed-based NAcc and OFC RSFC maps. Second, some of the candidate “reward” regions identified from the seed-based RSFC maps were more strongly connected to other systems in the graph analysis (e.g., inferior frontal gyrus, hippocampus, and thalamus), even though they overlapped with commonly activated regions in task-based studies of reward. This latter finding suggests that task-based studies of reward engage multiple systems (reward, subcortical, memory, and fronto-parietal systems) and that seed-based RSFC and task-based meta-analyses may be less well-suited to capture these distinctions. As such, it is not sufficient to propose a reward system based on voxel-based seed maps, nor is it sufficient to do

so using meta-analyses of task-based reward studies. By identifying networks which are consistent across a variety of methods, we can better characterize these networks refine them as needed.

Graph-theoretical approaches are better suited to segregate brain regions into brain systems, however this approach too is limited as community assignments are highly dependent on how nodes are defined and on the correlation thresholding applied to the graph. The present study used nearly identical methods from prior work (Power et al., 2014) on a set of brain regions modified from Power and colleagues (2011) and identified a reward system not previously observed using the original set of regions. The regions were purposefully modified using seed-based RSFC to refine the graph to include regions commonly associated with reward processing and their neighbors, and, when possible, regions were further refined on a subject-by-subject basis using anatomical segmentation. Similar modifications of the canonical Power et al. (2011) graph were previously used to demonstrate distinct neurophysiological subtypes of depression using RSFC data (Drysdale et al., 2016).

Over the past decade there has been a growing interest in using RSFC data to parcellate the human cortex into cortical areas. Future work may be able to leverage these more sophisticated parcellation schemes (e.g., Glasser et al., 2016; Gordon et al., 2014) to further refine reward system identification and characterization. Given enough data on an individual, subject-specific brain parcellation may also further this endeavor (Gordon, Laumann, Adeyemo, & Petersen, 2015; Laumann et al., 2015). With those limitations in mind, the reward system delineated in the current work defines a set of regions that future studies may capitalize on to better understand reward motivation, appetitive behavior and self-regulatory control. Other groups have identified a similar system or set of brain regions using other methods, without the

goal of specifically defining a reward system (Choi et al., 2012; Davis et al., 2013). The overlap between the current results and previous work, particularly across methods suggests the concept of a set of brain regions which support reward processing and are highly coupled at rest.

Although additional brain regions are often co-activated with these core regions during reward processing, it would be inappropriate to include them in the definition of a reward system as they are better members of other RSFC brain systems.

## **Summary**

The current study characterized the systems-level organization of putative reward regions of at rest, identifying a heterogeneous set of regions including cortical and subcortical nodes which are preferentially coupled to each other and that may reflect a resting reward system. The high degree of similarity between seed-based RSFC maps of putative reward regions and meta-analytical maps of task-based reward suggested a putative reward system that was formally tested using graph-theory analysis. To afford the best chance of identifying a reward system, a previously published set of nodes (Power et al., 2011) was modified to include reward-sensitive brain regions and their neighbors. We then used a data-driven community assignment approach and identified a reliable reward system consisting of regions that both overlapped with and constrained task-based reward activation maps. By delineating and characterizing the reward system at rest in this way, future work may benefit from more spatially constrained analyses that target individual and group differences in reward processing and control. Thus far, the regulation of these reward regions has been a highly debated topic (Kelley et al., 2015), in part because the reward system has not been formally defined despite a consistent pattern of task-based reward activity in the literature and also because it is difficult to identify a commonly activated set of



brain regions associated with self-regulation. Although it is not yet clear whether RSFC can be used to assess directionality of information flow between regions and systems, it can be used to constrain the brain regions that comprise a functionally-connected reward system and to identify critical through-points between reward and putative control systems that can be targeted in future intervention studies.

## **Acknowledgements**

This work was supported by NIH DA022582, MH059282, AA021347, HL114092, NSF BCS-0746220, the Neukom Institute for Computational Science at Dartmouth College, and the Dartmouth Brain Imaging Center.

## References

- Barnes, K. A., Cohen, A. L., Power, J. D., Nelson, S. M., Dosenbach, Y. B. L., Miezin, F. M., ... Schlaggar, B. L. (2010). Identifying Basal Ganglia divisions in individuals using resting-state functional connectivity MRI. *Frontiers in Systems Neuroscience*, 4, 18. <https://doi.org/10.3389/fnsys.2010.00018>
- Berridge, K. C., & Kringelbach, M. L. (2008). Affective neuroscience of pleasure: reward in humans and animals. *Psychopharmacology*, 199(3), 457–480. <https://doi.org/10.1007/s00213-008-1099-6>
- Boileau, I., Assaad, J.-M., Pihl, R. O., Benkelfat, C., Leyton, M., Diksic, M., ... Dagher, A. (2003). Alcohol promotes dopamine release in the human nucleus accumbens. *Synapse (New York, N.Y.)*, 49(4), 226–231. <https://doi.org/10.1002/syn.10226>
- Breiter, H. C., Gollub, R. L., Weisskoff, R. M., Kennedy, D. N., Makris, N., Berke, J. D., ... Hyman, S. E. (1997). Acute effects of cocaine on human brain activity and emotion. *Neuron*, 19(3), 591–611. [https://doi.org/10.1016/S0896-6273\(00\)80374-8](https://doi.org/10.1016/S0896-6273(00)80374-8)
- Carelli, R. M., Ijames, S. G., & Crumling, a J. (2000). Evidence that separate neural circuits in the nucleus accumbens encode cocaine versus “natural” (water and food) reward. *The Journal of Neuroscience : The Official Journal of the Society for Neuroscience*, 20(11), 4255–4266. <https://doi.org/20/11/4255> [pii]
- Carter, B. L., & Tiffany, S. T. (1999). Meta-analysis of cue-reactivity in addiction research. *Addiction (Abingdon, England)*, 94(3), 327–340. <https://doi.org/10.1046/j.1360-0443.1999.9433273.x>
- Casey, B. J., Jones, R. M., & Hare, T. A. (2008, March). The adolescent brain. *Annals of the New York Academy of Sciences*. <https://doi.org/10.1196/annals.1440.010>
- Casey, B. J., Somerville, L. H., Gotlib, I. H., Ayduk, O., Franklin, N. T., Askren, M. K., ... Shoda, Y. (2011). Behavioral and neural correlates of delay of gratification 40 years later. *Proceedings of the National Academy of Sciences of the United States of America*, 108(36), 14998–15003. <https://doi.org/10.1073/pnas.1108561108>
- Cauda, F., Cavanna, A. E., D’agata, F., Sacco, K., Duca, S., & Geminiani, G. C. (2011). Functional connectivity and coactivation of the nucleus accumbens: a combined functional connectivity and structure-based meta-analysis. *Journal of Cognitive Neuroscience*, 23(10), 2864–2877. <https://doi.org/10.1162/jocn.2011.21624>
- Chavez, R. S., & Heatherton, T. F. (2016). Structural integrity of frontostriatal connections predicts longitudinal changes in self-esteem. *Social Neuroscience*, 1–7. <https://doi.org/10.1080/17470919.2016.1164753>
- Choi, E. Y., Yeo, B. T. T., & Buckner, R. L. (2012). The organization of the human striatum estimated by intrinsic functional connectivity. *Journal of Neurophysiology*, 108(8), 2242–2263. <https://doi.org/10.1152/jn.00270.2012>
- Cloutier, J., Heatherton, T. F., Whalen, P. J., & Kelley, W. M. (2008). Are attractive people rewarding? Sex differences in the neural substrates of facial attractiveness. *Journal of Cognitive Neuroscience*, 20(6), 941–951. <https://doi.org/10.1162/jocn.2008.20062>
- Corbetta, M. (1998). Frontoparietal cortical networks for directing attention and the eye to visual locations: identical, independent, or overlapping neural systems? *Proceedings of the National Academy of Sciences of the United States of America*, 95(3), 831–838. Retrieved from <http://www.ncbi.nlm.nih.gov/pubmed/9448248>

- Crossley, N. A., Mechelli, A., Vértes, P. E., Winton-Brown, T. T., Patel, A. X., Ginestet, C. E., ... Bullmore, E. T. (2013). Cognitive relevance of the community structure of the human brain functional coactivation network. *Proceedings of the National Academy of Sciences of the United States of America*, *110*(28), 11583–11588. <https://doi.org/10.1073/pnas.1220826110>
- Damsma, G., Pfaus, J. G., Wenkstern, D., Phillips, A. G., & Fibiger, H. C. (1992). Sexual behavior increases dopamine transmission in the nucleus accumbens and striatum of male rats: comparison with novelty and locomotion. *Behavioral Neuroscience*, *106*(1), 181–191. Retrieved from <http://www.ncbi.nlm.nih.gov/pubmed/1313243>
- Davis, F. C., Knodt, A. R., Sporns, O., Lahey, B. B., Zald, D. H., Brigidi, B. D., & Hariri, A. R. (2013). Impulsivity and the modular organization of resting-state neural networks. *Cerebral Cortex (New York, N.Y. : 1991)*, *23*(6), 1444–1452. <https://doi.org/10.1093/cercor/bhs126>
- Demos, K. E., Heatherton, T. F., & Kelley, W. M. (2012). Individual differences in nucleus accumbens activity to food and sexual images predict weight gain and sexual behavior. *J Neurosci*, *32*(16), 5549–5552. <https://doi.org/10.1523/JNEUROSCI.5958-11.2012>
- Di Martino, A., Scheres, A., Margulies, D. S., Kelly, a M. C., Uddin, L. Q., Shehzad, Z., ... Milham, M. P. (2008). Functional connectivity of human striatum: a resting state fMRI study. *Cerebral Cortex*, *18*(12), 2735–2747. <https://doi.org/10.1093/cercor/bhn041>
- Dosenbach, N. U. F., Fair, D. A., Miezin, F. M., Cohen, A. L., Wenger, K. K., Dosenbach, R. A. T., ... Petersen, S. E. (2007). Distinct brain networks for adaptive and stable task control in humans. *Proc Natl Acad Sci U S A*, *104*(26), 11073–11078. <https://doi.org/10.1073/pnas.0704320104> [pii]10.1073/pnas.0704320104
- Dosenbach, N. U. F., Nardos, B., Cohen, A. L., Fair, D. A., Power, J. D., Church, J. A., ... Schlaggar, B. L. (2010). Prediction of individual brain maturity using fMRI. *Science (New York, N.Y.)*, *329*(5997), 1358–1361. <https://doi.org/10.1126/science.1194144>
- Dosenbach, N. U. F., Visscher, K. M., Palmer, E. D., Miezin, F. M., Wenger, K. K., Kang, H. C., ... Petersen, S. E. (2006). A core system for the implementation of task sets. *Neuron*, *50*(5), 799–812. <https://doi.org/10.1016/j.neuron.2006.04.031>
- Drysdale, A. T., Grosenick, L., Downar, J., Dunlop, K., Mansouri, F., Meng, Y., ... Liston, C. (2016). Resting-state connectivity biomarkers define neurophysiological subtypes of depression. *Nature Medicine*, (December). <https://doi.org/10.1038/nm.4246>
- Due, D. L., Huettel, S. A., Hall, W. G., & Rubin, D. C. (2002). Activation in mesolimbic and visuospatial neural circuits elicited by smoking cues: Evidence from functional magnetic resonance imaging. *American Journal of Psychiatry*, *159*(6), 954–960. <https://doi.org/10.1176/appi.ajp.159.6.954>
- Everitt, B. J. (1990). Sexual motivation: a neural and behavioural analysis of the mechanisms underlying appetitive and copulatory responses of male rats. *Neuroscience and Biobehavioral Reviews*, *14*(2), 217–232. Retrieved from <http://www.ncbi.nlm.nih.gov/pubmed/2190121>
- Fischl, B., van der Kouwe, A., Destrieux, C., Halgren, E., Ségonne, F., Salat, D. H., ... Dale, A. M. (2004). Automatically Parcellating the Human Cerebral Cortex. *Cerebral Cortex*, *14*(1), 11–22. <https://doi.org/10.1093/cercor/bhg087>
- Garavan, H., Pankiewicz, J., Bloom, A., Cho, J. K., Sperry, L., Ross, T. J., ... Stein, E. A. (2000). Cue-induced cocaine craving: Neuroanatomical specificity for drug users and drug stimuli. *American Journal of Psychiatry*, *157*(11), 1789–1798. <https://doi.org/10.1176/appi.ajp.157.11.1789>

- Gerraty, R. T., Davidow, J. Y., Wimmer, G. E., Kahn, I., & Shohamy, D. (2014). Transfer of Learning Relates to Intrinsic Connectivity between Hippocampus, Ventromedial Prefrontal Cortex, and Large-Scale Networks. *Journal of Neuroscience*, *34*(34), 11297–11303. <https://doi.org/10.1523/JNEUROSCI.0185-14.2014>
- Glasser, M. F., Coalson, T. S., Robinson, E. C., Hacker, C. D., Harwell, J., Yacoub, E., ... Van Essen, D. C. (2016). A multi-modal parcellation of human cerebral cortex. *Nature*, *536*(7615), 171–178. <https://doi.org/10.1038/nature18933>
- Gordon, E. M. E. M., Laumann, T. O. T. O., Adeyemo, B., Huckins, J. F. J. F., Kelley, W. M. W. M., & Petersen, S. E. (2016). Generation and Evaluation of a Cortical Area Parcellation from Resting-State Correlations. *Cerebral Cortex*, *26*(1), 288–303. <https://doi.org/10.1093/cercor/bhu239>
- Gordon, E. M., Laumann, T. O., Adeyemo, B., & Petersen, S. E. (2015). Individual Variability of the System-Level Organization of the Human Brain. *Cerebral Cortex (New York, N.Y. : 1991)*, *27*(1), bhv239. <https://doi.org/10.1093/cercor/bhv239>
- Gottfried, J. A., O’Doherty, J., & Dolan, R. J. (2003). Encoding predictive reward value in human amygdala and orbitofrontal cortex. *Science (New York, N.Y.)*, *301*(5636), 1104–1107. <https://doi.org/10.1126/science.1087919>
- Harris, J. L., Bargh, J. A., & Brownell, K. D. (2009). Priming effects of television food advertising on eating behavior. *Health Psychology : Official Journal of the Division of Health Psychology, American Psychological Association*, *28*(4), 404–413. <https://doi.org/10.1037/a0014399>
- Janes, A. C., Pizzagalli, D. A., Richardt, S., deB Frederick, B., Chuzi, S., Pachas, G., ... Kaufman, M. J. (2010). Brain reactivity to smoking cues prior to smoking cessation predicts ability to maintain tobacco abstinence. *Biological Psychiatry*, *67*(8), 722–729. [https://doi.org/S0006-3223\(10\)00010-7](https://doi.org/S0006-3223(10)00010-7) [pii]10.1016/j.biopsych.2009.12.034
- Kelley, W. M., Macrae, C. N., Wyland, C. L., Caglar, S., Inati, S., & Heatherton, T. F. (2002). Finding the Self? An Event-Related fMRI Study. *Journal of Cognitive Neuroscience*, *14*(5), 785–794. <https://doi.org/10.1162/08989290260138672>
- Kelley, W. M., Wagner, D. D., & Heatherton, T. F. (2015). In Search of a Human Self-Regulation System. *Annual Review of Neuroscience*, *38*(1), 389–411. <https://doi.org/10.1146/annurev-neuro-071013-014243>
- Knutson, B., Taylor, J., Kaufman, M., Peterson, R., & Glover, G. (2005). Distributed neural representation of expected value. *The Journal of Neuroscience : The Official Journal of the Society for Neuroscience*, *25*, 4806–4812. <https://doi.org/10.1523/JNEUROSCI.0642-05.2005>
- Koob, G. F., & Volkow, N. D. (2010). Neurocircuitry of addiction. *Neuropsychopharmacology : Official Publication of the American College of Neuropsychopharmacology*, *35*(1), 217–238. <https://doi.org/10.1038/npp.2009.110>
- Kringelbach, M. L. (2005). The human orbitofrontal cortex: linking reward to hedonic experience. *Nature Reviews Neuroscience*, *6*(9), 691–702. <https://doi.org/10.1038/nrn1747>
- Kringelbach, M. L. L., O’Doherty, J., Rolls, E. T., & Andrews, C. (2003). Activation of the human orbitofrontal cortex to a liquid food stimulus is correlated with its subjective pleasantness. *Cerebral Cortex (New York, N.Y. : 1991)*, *13*(10), 1064–1071. <https://doi.org/10.1093/cercor/13.10.1064>
- Lambert, K. G., Neal, T., Noyes, J., Parker, C., & Worrel, P. (1991). Food-related stimuli increase desire to eat in hungry and satiated human subjects. *Current Psychology*, *10*(4),

- 297–303. <https://doi.org/10.1007/BF02686902>
- Laumann, T. O., Gordon, E. M., Adeyemo, B., Snyder, A. Z., Joo, S. J., Chen, M.-Y., ... Petersen, S. E. (2015). Functional System and Areal Organization of a Highly Sampled Individual Human Brain. *Neuron*, 87(3), 1–14. <https://doi.org/10.1016/j.neuron.2015.06.037>
- Lopez, R. B., Chen, P. H. A., Huckins, J. F., Hofmann, W., Kelley, W. M., & Heatherton, T. F. (2017). A balance of activity in brain control and reward systems predicts self-regulatory outcomes. *Social Cognitive and Affective Neuroscience*, 12(5), 832–838. <https://doi.org/10.1093/scan/nsx004>
- Lopez, R. B., Hofmann, W., Wagner, D. D., Kelley, W. M., & Heatherton, T. F. (2014). Neural Predictors of Giving in to Temptation in Daily Life. *Psychological Science*, 0956797614531492-. <https://doi.org/10.1177/0956797614531492>
- Marcus, D. S., Fotenos, A. F., Csernansky, J. G., Morris, J. C., & Buckner, R. L. (2010). Open access series of imaging studies: longitudinal MRI data in nondemented and demented older adults. *Journal of Cognitive Neuroscience*, 22(12), 2677–2684. <https://doi.org/10.1162/jocn.2009.21407>
- McClernon, F. J., Kozink, R. V., & Rose, J. E. (2008). Individual differences in nicotine dependence, withdrawal symptoms, and sex predict transient fMRI-BOLD responses to smoking cues. *Neuropsychopharmacology : Official Publication of the American College of Neuropsychopharmacology*, 33(9), 2148–2157. <https://doi.org/10.1038/sj.npp.1301618>
- Mischel, W., Shoda, Y., & Rodriguez, M. (1989). Delay of gratification in children. *Science (New York, N.Y.)*, 244(4907), 933–938. <https://doi.org/10.1126/science.2658056>
- Moran, J. M., Macrae, C. N., Heatherton, T. F., Wyland, C. L., & Kelley, W. M. (2006). Neuroanatomical evidence for distinct cognitive and affective components of self. *Journal of Cognitive Neuroscience*, 18(9), 1586–1594. <https://doi.org/10.1162/jocn.2006.18.9.1586>
- Power, J. D., Cohen, A. L., Nelson, S. M., Wig, G. S., Barnes, K. A., Church, J. A., ... Petersen, S. E. (2011). Functional network organization of the human brain. *Neuron*, 72(4), 665–678. <https://doi.org/10.1016/j.neuron.2011.09.006>
- Power, J. D., Schlaggar, B. L. L., Lessov-Schlaggar, C. N. N., & Petersen, S. E. E. (2013). Evidence for Hubs in Human Functional Brain Networks. *Neuron*, 79(4), 798–813. <https://doi.org/10.1016/j.neuron.2013.07.035>
- Rapuno, K. M., Huckins, J. F., Sargent, J. D., Heatherton, T. F., & Kelley, W. M. (2016). Individual Differences in Reward and Somatosensory-Motor Brain Regions Correlate with Adiposity in Adolescents. *Cerebral Cortex*, 26(6), 2602–2611. <https://doi.org/10.1093/cercor/bhv097>
- Rapuno, K. M., Zieselman, A. L., Kelley, W. M., Sargent, J. D., Heatherton, T. F., & Gilbert-Diamond, D. (2017). Genetic risk for obesity predicts nucleus accumbens size and responsivity to real-world food cues. *Proceedings of the National Academy of Sciences*, 114(1), 160–165. <https://doi.org/10.1073/pnas.1605548113>
- Rosvall, M., & Bergstrom, C. T. (2008). Maps of random walks on complex networks reveal community structure. *Proceedings of the National Academy of Sciences of the United States of America*, 105(4), 1118–1123. <https://doi.org/10.1073/pnas.0706851105>
- Sadaghiani, S., & D'Esposito, M. (2015). Functional Characterization of the Cingulo-Opercular Network in the Maintenance of Tonic Alertness. *Cerebral Cortex*, 25(9), 2763–2773. <https://doi.org/10.1093/cercor/bhu072>
- Santaracchi, E., Galli, G., Polizzotto, N. R., Rossi, A., & Rossi, S. (2014). Efficiency of weak brain connections support general cognitive functioning. *Human Brain Mapping*, 35(9),



- 4566–4582. <https://doi.org/10.1002/hbm.22495>
- Sayette, M. a., & Hufford, M. R. (1997). Effects of smoking urge on generation of smoking-related information. *Journal of Applied Social Psychology*, 27(16), 1395–1405. <https://doi.org/10.1111/j.1559-1816.1997.tb01604.x>
- Schilström, B., Svensson, H. M., Svensson, T. H., & Nomikos, G. G. (1998). Nicotine and food induced dopamine release in the nucleus accumbens of the rat: putative role of alpha7 nicotinic receptors in the ventral tegmental area. *Neuroscience*, 85(4), 1005–1009. Retrieved from <http://www.ncbi.nlm.nih.gov/pubmed/9681941>
- Serrano, M. A., Boguñá, M., & Vespignani, A. (2009). Extracting the multiscale backbone of complex weighted networks. *Proceedings of the National Academy of Sciences of the United States of America*, 106(16), 6483–6488. <https://doi.org/10.1073/pnas.0808904106>
- Sescousse, G., Caldú, X., Segura, B., & Dreher, J.-C. (2013). Processing of primary and secondary rewards: a quantitative meta-analysis and review of human functional neuroimaging studies. *Neuroscience & Biobehavioral Reviews*, 37(4), 681–696. <https://doi.org/10.1016/j.neubiorev.2013.02.002>
- Shulman, G. L., Fiez, J. A., Corbetta, M., Buckner, R. L., Miezin, F. M., Raichle, M. E., & Petersen, S. E. (1997). Common Blood Flow Changes across Visual Tasks: II. Decreases in Cerebral Cortex. *Journal of Cognitive Neuroscience*, 9(5), 648–663. <https://doi.org/10.1162/jocn.1997.9.5.648>
- Smith, S. M., Fox, P. T., Miller, K. L., Glahn, D. C., Fox, P. M., Mackay, C. E., ... Beckmann, C. F. (2009). Correspondence of the brain's functional architecture during activation and rest. *Proceedings of the National Academy of Sciences*, 106(31), 13040–13045. <https://doi.org/10.1073/pnas.0905267106>
- Somerville, L. H., & Casey, B. J. (2010). Developmental neurobiology of cognitive control and motivational systems. *Current Opinion in Neurobiology*, 20(2), 236–241. <https://doi.org/10.1016/j.conb.2010.01.006>
- Somerville, L. H., Hare, T., & Casey, B. J. (2011). Frontostriatal maturation predicts cognitive control failure to appetitive cues in adolescents. *Journal of Cognitive Neuroscience*, 23(9), 2123–2134. <https://doi.org/10.1162/jocn.2010.21572>
- Stice, E., Yokum, S., Bohon, C., Marti, N., & Smolen, A. (2010). Reward circuitry responsivity to food predicts future increases in body mass: moderating effects of DRD2 and DRD4. *NeuroImage*, 50(4), 1618–1625. <https://doi.org/10.1016/j.neuroimage.2010.01.081>
- Talairach, J., & Tournoux, P. (1988). *Co-Planar Stereotaxis Atlas of the Human Brain*. Direct (Vol. 270). New York: Thieme Medical Publishers, Inc.
- Tomasi, D., Wang, R., Wang, G.-J., & Volkow, N. D. (2013). Functional Connectivity and Brain Activation: A Synergistic Approach. *Cerebral Cortex (New York, N.Y. : 1991)*, bht119-. <https://doi.org/10.1093/cercor/bht119>
- van der Laan, L. N., de Ridder, D. T. D., Viergever, M. A., & Smeets, P. A. M. (2011). The first taste is always with the eyes: A meta-analysis on the neural correlates of processing visual food cues. *NeuroImage*, 55(1), 296–303. <https://doi.org/10.1016/j.neuroimage.2010.11.055>
- Van Essen, D. C., Glasser, M. F., Dierker, D. L., Harwell, J., & Coalson, T. (2012). Parcellations and hemispheric asymmetries of human cerebral cortex analyzed on surface-based atlases. *Cerebral Cortex (New York, N.Y. : 1991)*, 22(10), 2241–2262. <https://doi.org/10.1093/cercor/bhr291>
- Volkow, N. D., Wang, G.-J., Fowler, J. S., Tomasi, D., & Telang, F. (2011). Addiction: beyond dopamine reward circuitry. *Proceedings of the National Academy of Sciences of the United*

- States of America*, 108(37), 15037–15042. <https://doi.org/10.1073/pnas.1010654108>
- Wagner, D. D., Boswell, R. G., Kelley, W. M., & Heatherton, T. F. (2012). Inducing negative affect increases the reward value of appetizing foods in dieters. *Journal of Cognitive Neuroscience*, 24(7), 1625–1633. [https://doi.org/10.1162/jocn\\_a\\_00238](https://doi.org/10.1162/jocn_a_00238)
- Warren, D. E., Power, J. D., Bruss, J., Denburg, N. L., Waldron, E. J., Sun, H., ... Tranel, D. (2014). Network measures predict neuropsychological outcome after brain injury. *Proceedings of the National Academy of Sciences*, 111(39), 14247–14252. <https://doi.org/10.1073/pnas.1322173111>
- Weiland, B. J., Welsh, R. C., Yau, W.-Y. W., Zucker, R. A., Zubieta, J.-K., & Heitzeg, M. M. (2013). Accumbens functional connectivity during reward mediates sensation-seeking and alcohol use in high-risk youth. *Drug and Alcohol Dependence*, 128(1–2), 130–139. <https://doi.org/10.1016/j.drugalcdep.2012.08.019>
- Xia, M., Wang, J., & He, Y. (2013). BrainNet Viewer: A Network Visualization Tool for Human Brain Connectomics. *PLoS ONE*, 8(7), e68910. <https://doi.org/10.1371/journal.pone.0068910>
- Yarkoni, T., Poldrack, R. A., Nichols, T. E., Van Essen, D. C., & Wager, T. D. (2011). Large-scale automated synthesis of human functional neuroimaging data. *Nature Methods*, 8(8), 665–670. <https://doi.org/10.1038/nmeth.1635>
- Zanto, T. P., & Gazzaley, A. (2013). Fronto-parietal network: flexible hub of cognitive control. *Trends in Cognitive Sciences*, 17(12), 602–603. <https://doi.org/10.1016/j.tics.2013.10.001>



**Tables**

| NAcc       |                         |             | OFC        |                      |             |
|------------|-------------------------|-------------|------------|----------------------|-------------|
| Rank Order | Non-Anatomical Terms    | Correlation | Rank Order | Non-Anatomical Terms | Correlation |
| 1          | reward                  | 0.58        | 4          | reward               | 0.27        |
| 8          | rewards                 | 0.46        | 10         | value                | 0.21        |
| 9          | monetary                | 0.44        | 13         | rewards              | 0.19        |
| 10         | incentive               | 0.43        | 16         | monetary             | 0.18        |
| 14         | motivation              | 0.40        | 18         | inventive            | 0.18        |
| 15         | value                   | 0.40        | 19         | food                 | 0.18        |
| 16         | anticipation            | 0.39        | 25         | anticipation         | 0.17        |
| 18         | reward anticipation     | 0.39        | 27         | money                | 0.17        |
| 19         | incentive delay         | 0.37        | 30         | reward anticipation  | 0.16        |
| 21         | punishment              | 0.36        | 31         | working              | 0.16        |
| Rank Order | Anatomical Terms        | Correlation | Rank Order | Anatomical Terms     | Correlation |
| 2          | ventral striatum        | 0.55        | 1          | orbitofrontal cortex | 0.38        |
| 3          | accumbens               | 0.51        | 2          | orbitofrontal        | 0.37        |
| 4          | nucleus accumbens       | 0.51        | 3          | ofc                  | 0.28        |
| 5          | striatum                | 0.50        | 5          | cortex ofc           | 0.27        |
| 6          | orbitofrontal           | 0.47        | 6          | anterior cingulate   | 0.25        |
| 7          | orbitofrontal cortex    | 0.46        | 7          | ventral striatum     | 0.25        |
| 11         | ventral                 | 0.43        | 8          | striatum             | 0.24        |
| 12         | nucleus                 | 0.40        | 9          | anterior             | 0.23        |
| 13         | ventromedial            | 0.40        | 11         | vmpfc                | 0.20        |
| 17         | ventromedial prefrontal | 0.39        | 12         | subgenual            | 0.20        |

**Table I.** Top 10 non-anatomical and anatomical feature term correlations between seed-based NAcc (left) and OFC (right) RSFC and task-based reverse-inference Z-score images from the Neurosynth Decoder (Yarkoni et al., 2011).

| Nodes modified from Power et al. (2011) data set |         |     |     |                      |     |     |
|--------------------------------------------------|---------|-----|-----|----------------------|-----|-----|
| Brain Area                                       | Removed |     |     | Added                |     |     |
|                                                  | X       | Y   | Z   | X                    | Y   | Z   |
| Nucleus accumbens                                |         |     |     | Individually defined |     |     |
| Nucleus accumbens                                |         |     |     | Individually defined |     |     |
| Medial orbitofrontal cortex                      | -3      | 44  | -9  | 1                    | 44  | -7  |
|                                                  | 8       | 42  | -5  |                      |     |     |
| Lateral orbitofrontal cortex                     | 24      | 32  | -18 | 23                   | 33  | -13 |
| Lateral orbitofrontal cortex                     | -21     | 41  | -20 | -24                  | 34  | -13 |
| Thalamus                                         | -2      | -13 | 12  | Individually defined |     |     |
| Thalamus                                         | 8       | 42  | -5  | Individually defined |     |     |
| Hippocampus                                      | -21     | -22 | -20 | Individually defined |     |     |
| Hippocampus                                      | 17      | -28 | -17 | Individually defined |     |     |
| Ventral tegmental area                           |         |     |     | 0                    | -16 | -16 |
| Caudate                                          |         |     |     | Individually defined |     |     |
| Caudate                                          |         |     |     | Individually defined |     |     |
| BA 46                                            | -48     | 38  | 21  | -47                  | 38  | 14  |
| BA 46                                            |         |     |     | 47                   | 40  | 10  |
| Putamen                                          | 27      | 16  | -17 | Individually defined |     |     |
| BA 9                                             | -47     | 11  | 23  | -49                  | 8   | 29  |
| BA37                                             |         |     |     | -57                  | -56 | -12 |
| BA40                                             |         |     |     | -60                  | -39 | 51  |

**Table II.** Peak coordinates are listed for all supplemental nodes and the nodes they replaced from the Power et al. (2011) parcellation scheme.

| <b>System Stability</b>                   |      |      |
|-------------------------------------------|------|------|
| <b>Superordinate Systems</b>              | Mean | Std  |
| Visual                                    | 0.86 | 0.29 |
| Somatomotor (Medial at all tie-densities) | 0.81 | 0.18 |
| Default                                   | 0.80 | 0.23 |
| FP                                        | 0.73 | 0.36 |
| CO/Saliience                              | 0.59 | 0.36 |
| <b>Subordinate Systems</b>                | Mean | Std  |
| Cerebellar                                | 0.85 | 0.07 |
| Reward                                    | 0.68 | 0.27 |
| DAN                                       | 0.51 | 0.33 |
| Subcortical                               | 0.51 | 0.25 |
| VAN                                       | 0.39 | 0.26 |
| Memory                                    | 0.26 | 0.08 |
| Lateral Somatomotor                       | 0.19 | 0.06 |

**Table III.** Stability of superordinate and subordinate systems across tie-densities. For each node that is a member of a given system at any tie-density between 2% and 20%, those nodes were selected, and the stability proportion metric was calculated. Stability proportion was calculated as the number of tie-densities a given system was observed at, divided by the number of tie-densities (19, 2%-20%). Systems with appearances in less than 1% of 271x19 matrix were excluded, including a second subcortical system.

## Figures

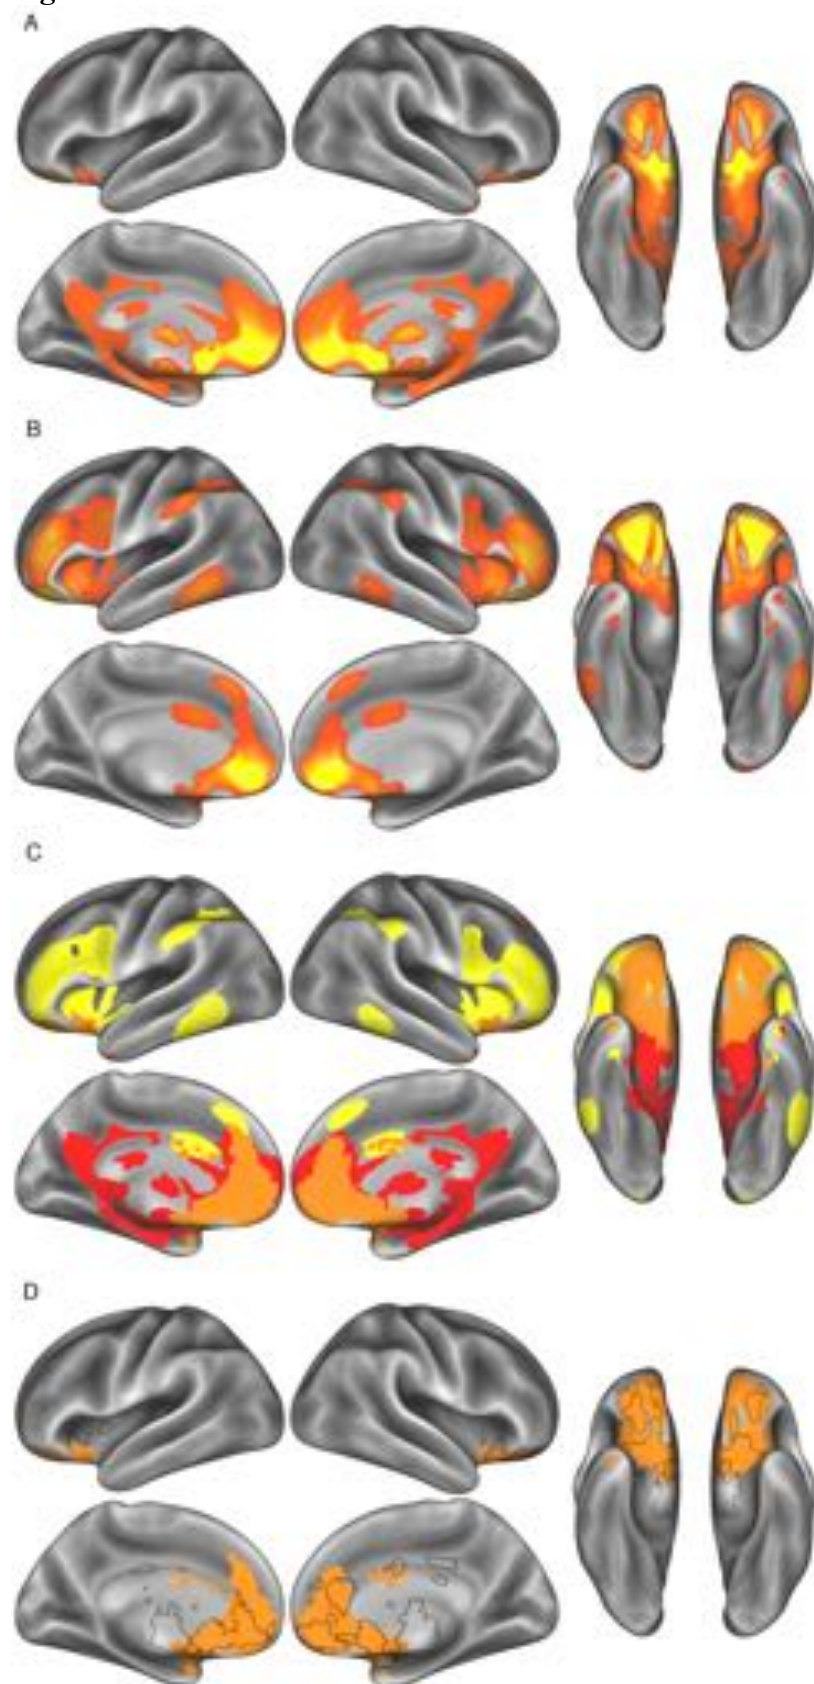

Figure 1. Seed-based RSFC for NAcc (A) and OFC (B). Independent connectivity for NAcc (C, red) and OFC (C, yellow) are displayed on the same surface, shown with shared connectivity (C, orange). Brain regions that are commonly activated in a meta-analysis of task-based studies on the feature term "reward" (D) (Yarkoni et al., 2011) are shown in black outline highlights over shared connectivity of the NAcc and OFC, shown in orange. RSFC data are thresholded at  $r > 0.05$  and are displayed on inflated lateral, medial, and ventral cortical surfaces. Seed locations for NAcc and OFC are highlighted as black spheres.

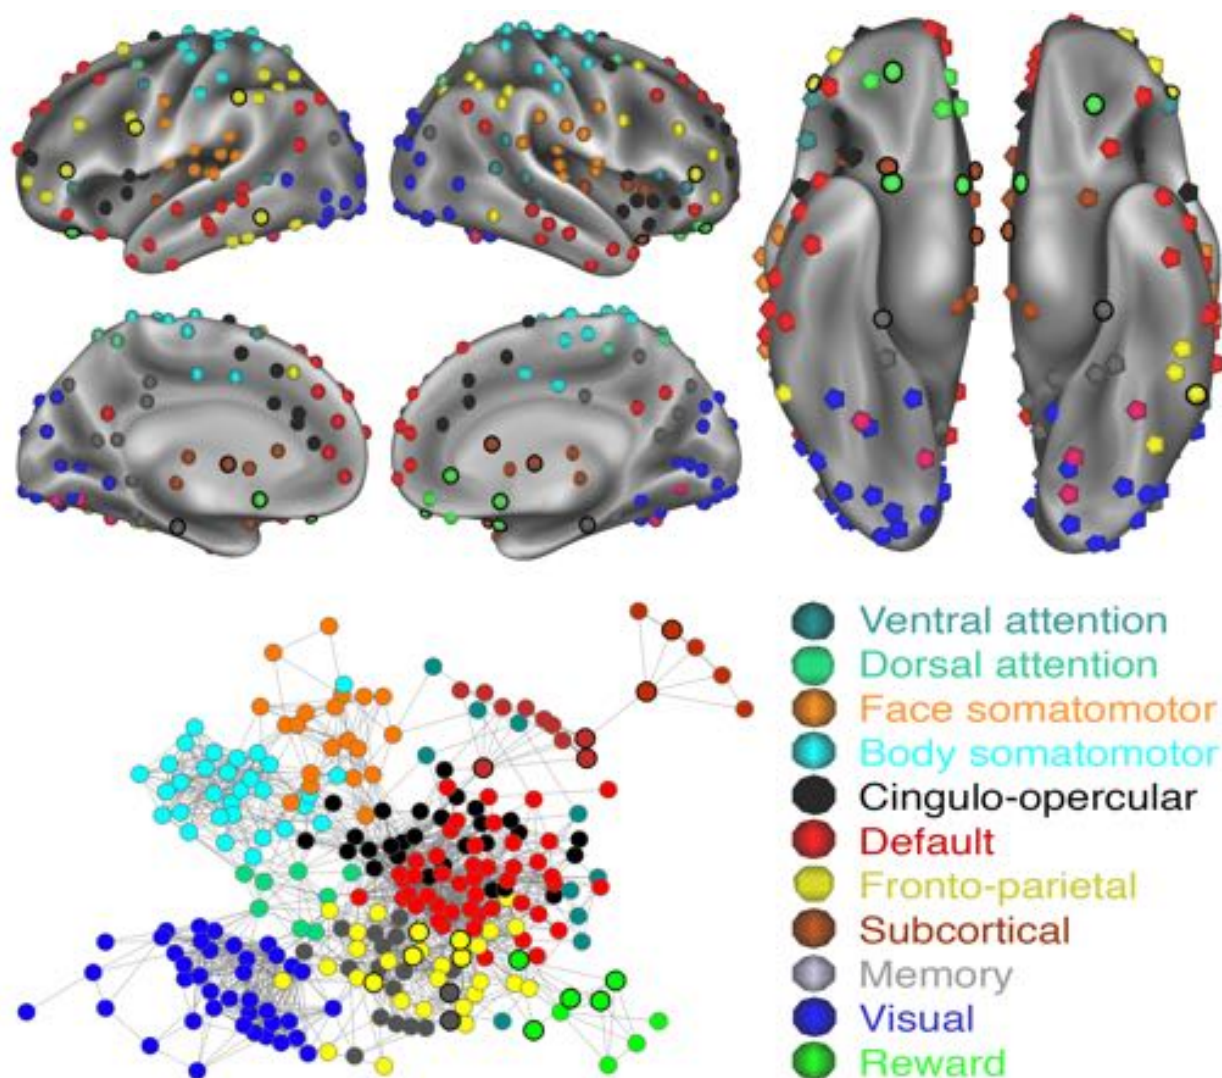

Figure 2. Community assignments displayed on an inflated cortical surface (top) at 5% tie density. A spring- embedded layout of the network graph visualizing network topology (bottom) displays nodes and community assignments at 5% tie density. Modified regions that were adapted from NAcc and OFC RSFC seed-based analyses are outlined in bold.



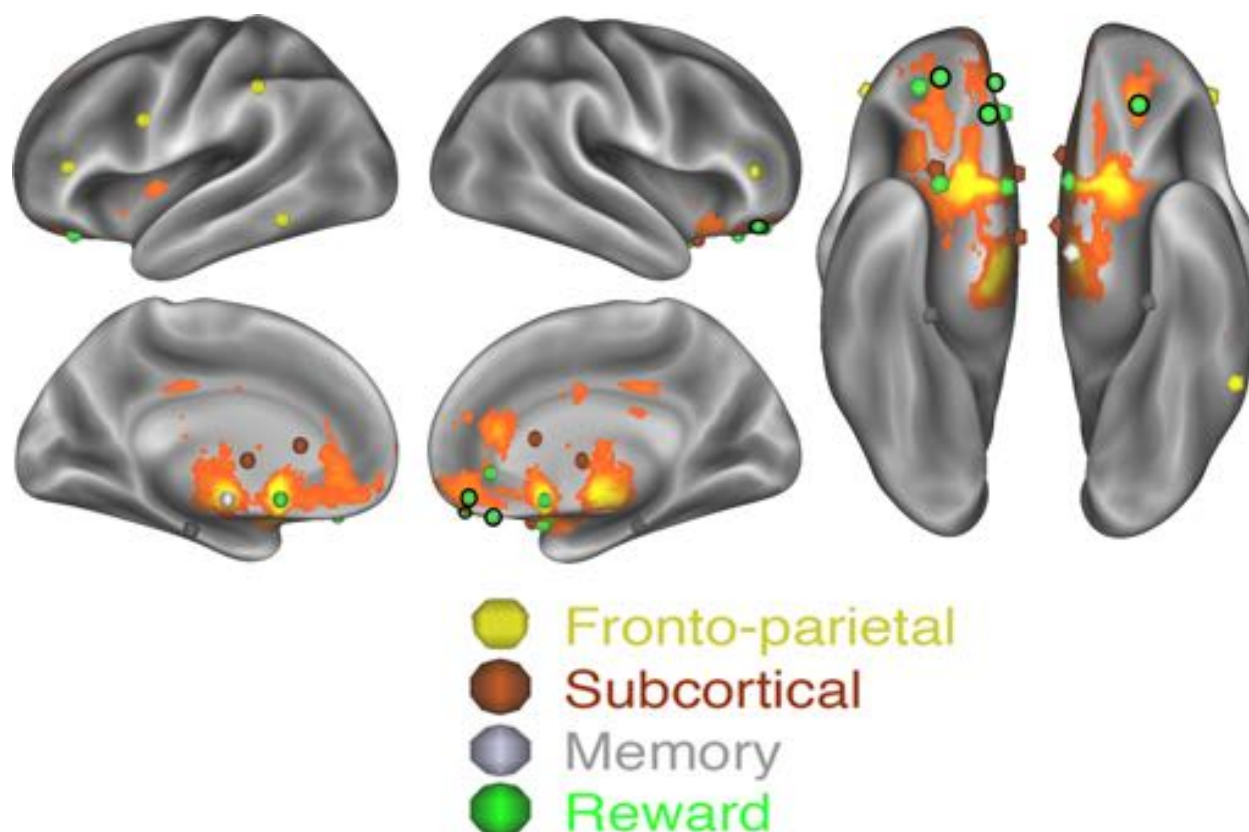

Figure 3. Candidate reward regions identified from seed-based RSFC (highlighted bold) and reward system regions identified from graph analysis (green) are displayed on the task-based meta-analysis of reward (Yarkoni et al., 2011). Several candidate reward regions were assigned to other systems and several additional nodes that were not directly identified in seed-based NAcc and OFC RSFC were assigned to the reward system via community detection.

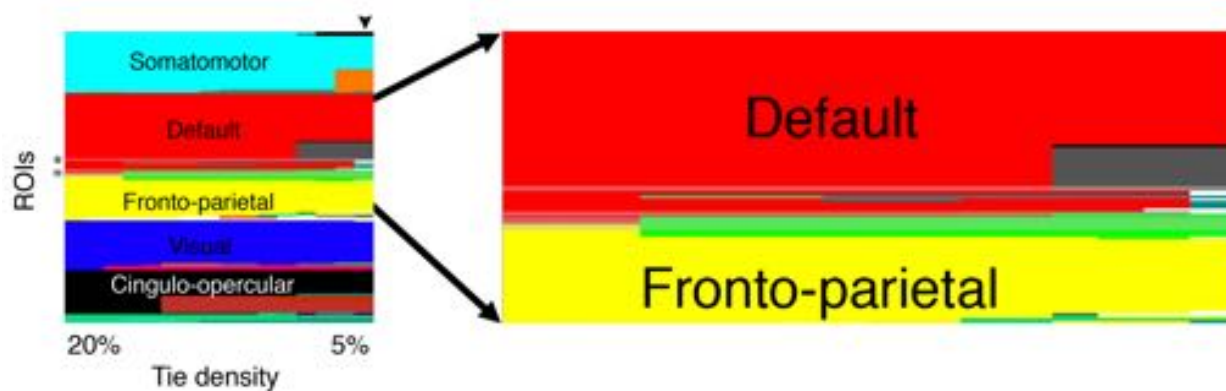

Figure 4. Plots are shown for node assignments into systems (left), with an enlarged view (right) which includes default, fronto-parietal, memory (in grey) and reward (in green) at tie densities from 20% down to 5% in 1% steps. Shaded rows and \* represent modified ROIs.



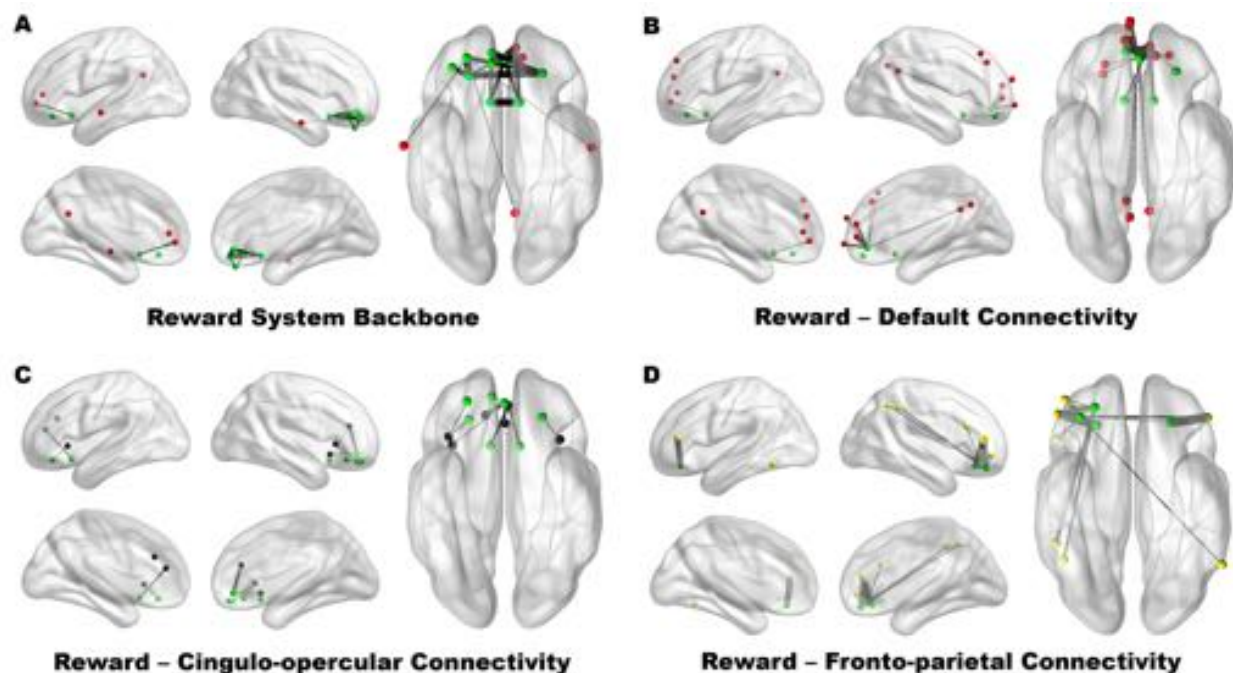

Figure 5. (A) Multiscale backbone connectivity ( $p < 0.01$ ) through reward system nodes demonstrate strongest between-system integration with the default system. (B-D) The top 5% of connections between default (B, red), cingulo-opercular (C, black), and fronto-parietal control (D, yellow) and reward system nodes (green) reveal greater connectivity between frontal regions of default, cingulo-opercular, and fronto-parietal control systems and OFC regions of the reward system. Between-system connectivity with the NAcc was restricted to the dorsal anterior cingulate cortex (BA 32; cingulo-opercular system) and the medial prefrontal cortex (BA 10; default system). Intra-system connectivity is not shown. Regions and connections are displayed on inflated lateral, medial, and ventral cortical surfaces using BrainNet Viewer (Xia et al., 2013).
